# Supplementary material for: Structural and chemical analysis of gadolinium halides encapsulated within WS2nanotubes
Source: Royal Society of Chemistry journal article supplement (doi:10.1039/c6nr02710e), 2016-01-01
Supplement: c6nr02710e1.pdf [file c6nr02710e1.pdf]

## Supporting Information

### Structural and Chemical Analysis of Gadolinium Halides encapsulated within WS<sub>2</sub> Nanotubes

E. A. Anumol,<sup>a</sup> Andrey N. Enyashin,<sup>b</sup> Nitin M. Batra,<sup>c</sup> Pedro M. F. J. Costa<sup>c</sup> and Francis Leonard Deepak<sup>a,\*</sup>

a. International Iberian Nanotechnology Laboratory (INL), Avenida Mestre Jose Veiga, Braga 4715-330, Portugal, E-

b. Ural Federal University, Institute of Mathematics and Computer Sciences, Turgeneva Str., 4, 620083  
Ekaterinburg, Russian Federation

c. King Abdullah University of Science and Technology, Physical Science and Engineering Division, Thuwal 23955-6900, Saudi Arabia

\*E-mail: leonard.francis@inl.int

### Table of Contents

Scheme S1. Formation of GdX<sub>3</sub> (X-Cl, Br, I) filled WS<sub>2</sub> nanotube

Table S1. Experimental Conditions of the filling of the WS<sub>2</sub> Nanotubes with GdI<sub>3</sub>.

Table S2. Experimental Conditions of the filling of the WS<sub>2</sub> Nanotubes with GdBr<sub>3</sub>.

Table S3. Experimental Conditions of the filling of the WS<sub>2</sub> Nanotubes with GdCl<sub>3</sub>.

Table S4: EDS elemental quantification of Gd and I in GdI<sub>3</sub>@WS<sub>2</sub> NT (Ref: Figure 1c).

Fig S1 a) HAADF-STEM image of the GdI<sub>3</sub> filled WS<sub>2</sub> nanotubes and b-e) corresponding EDS elemental maps showing W, S, Gd and I.

Fig S2 HAADF-STEM image of the GdI<sub>3</sub> filled WS<sub>2</sub> structure (a) and corresponding EDS elemental maps showing W (b), S (c), Gd (d) and I (e).

Fig S3 a) and b) are HRTEM and HAADF-STEM images of GdI<sub>3</sub>@WS<sub>2</sub> nanotubes showing the presence of GdI<sub>3</sub> inside the nanotube and on the surface obtained on using 1:10 ratio of WS<sub>2</sub>: GdI<sub>3</sub>. c) low magnification HAADF-STEM image of GdI<sub>3</sub>@WS<sub>2</sub> and the corresponding EELS spectrum images showing Gd and I. d) EELS spectrum.

Fig S4 HAADF-STEM images of GdBr<sub>3</sub> filled and coated WS<sub>2</sub> Nanotubes. Arrows show the GdBr<sub>3</sub> on the surface of WS<sub>2</sub> nanotube.

Fig S5 a) and b) end-on and side-on views of the empty WS<sub>2</sub> nanotube model; c) – g) HRTEM simulated images of b) at different defocus values.

Fig S6 a) and b) end-on and side-on views of the GdI<sub>3</sub> model; c) – g) HRTEM simulated images of b) at different defocus values.

Fig S7 a) and b) end-on and side-on views of filled nanotube model; c) – g) HRTEM simulated images of b) at different defocus values.

- Fig S8 a) Model for hexagonal WS<sub>2</sub> planes with interlayer stack rotation; b) Simulated ED pattern for a); c) Model for a heterostructure combining various WS<sub>2</sub> rotated monolayers and a GdI<sub>3</sub> crystallite on top; d) Simulated ED pattern for c).
- Fig S9 Tomograms of GdI<sub>3</sub> coated WS<sub>2</sub> nanotube a) HAADF-STEM Image b) Gd (Blue) and S (Yellow) and c) W (green) and I (red).
- Fig S10 HAADF-STEM (greyscale) and EDS elemental maps (Gd (blue), I (cyan), W (red), S (green)) of GdI<sub>3</sub> filled WS<sub>2</sub> a) at time 0 and b) after 30 minutes (after). The experiment was done at 80 kV using 0.64 nA probe current and a dose of 0.55 e/Å<sup>2</sup>s.
- Fig S11 HAADF images and EDS elemental maps (Gd (blue), I (cyan), W (red), S (green)) of GdI<sub>3</sub> filled WS<sub>2</sub> a) at time 0 and b) after 30 minutes of exposure. The experiment was done at 200 kV using 0.46 nA probe current and a dose of 0.40 e/Å<sup>2</sup>s.
- Fig S12 HAADF-STEM and EDS elemental maps (Gd (blue), I (cyan), W (red), S (green)) of GdI<sub>3</sub> filled WS<sub>2</sub> a) at time 0 and b) after 30 minutes of exposure. The experiment was done at 200 kV using 0.46 nA probe current and a dose of 0.40 e/Å<sup>2</sup>s.
- Fig. S13 Electron density redistribution in the layered crystals of GdCl<sub>3</sub> and GdI<sub>3</sub> within the intralayer Gd plane.
- Fig S14 Radial distribution functions of Gd and I ions within the melt part of GdI<sub>3</sub> penetrated into the cavity of double-walled (30,0)@(42,0) 2H-WS<sub>2</sub> nanotube after MD simulations during 4.8 ns at T = 1300K (*on the top*). Corresponding time modulation in stoichiometry of GdI<sub>3</sub> melt is given below.
- Fig S15 Pair distribution functions within GdX<sub>3</sub> drops (X = Cl, Br, I) after MD annealing of (GdX<sub>3</sub>)<sub>1000</sub> nanodrops during 2 ns at T = 1300K.
- S16 Video1-Tomography of GdI<sub>3</sub> on WS<sub>2</sub> Nanotube
- S17 Video2-EDS Tomography 1 - GdI<sub>3</sub>@WS<sub>2</sub> Nanotube
- S18 Video3-EDS Tomography 2 - GdI<sub>3</sub>@WS<sub>2</sub> Nanotube-Higher Electron Dose
- S19 Video4-MD-GdCl<sub>3</sub>-WS<sub>2</sub> or [https://youtu.be/WpOlybxT\\_4s](https://youtu.be/WpOlybxT_4s)
- S20 Video5-MD-GdBr<sub>3</sub>-WS<sub>2</sub> or [https://youtu.be/d-8u\\_snqI1c](https://youtu.be/d-8u_snqI1c)
- S21 Video6-MD-GdI<sub>3</sub>-WS<sub>2</sub> or <https://youtu.be/qVDE1vEXxo8>
- S22 Video7-MD-GdCl<sub>3</sub>-WS<sub>2</sub> 2 or <https://youtu.be/MGoYMfxv4ZE>

**Scheme S1** Formation of  $\text{GdX}_3$  (X=Cl, Br, I) filled  $\text{WS}_2$  nanotube

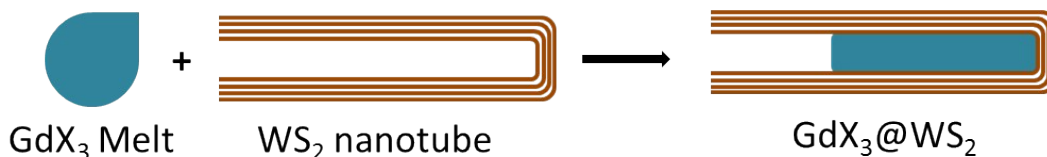

**Table S1** Experimental Conditions of the filling of the  $\text{WS}_2$  Nanotubes with  $\text{GdI}_3$  (Melting Point 926 °C). Temperature at which the filling reaction was carried out: 1000 °C (3° C/min heating and cooling rate).

| Sample | $\text{WS}_2$ NTs | $\text{GdI}_3$ | Wt Ratio | Reaction Time | Reaction Temperature |
|--------|-------------------|----------------|----------|---------------|----------------------|
| 1      | 30 mg             | 150 mg         | 1:5      | 72 h          | 1000°C               |
| 2      | 30 mg             | 225 mg         | 1:7      | 168 h         | 1000°C               |
| 3      | 30 mg             | 300 mg         | 1:10     | 168 h         | 1000°C               |

**Table S2** Experimental Conditions of the filling of the  $\text{WS}_2$  Nanotubes with  $\text{GdBr}_3$  (Melting Point 770 °C). Temperature at which the filling reaction was carried out – 1000 °C (3° C heating and cooling rate).

| Sample | $\text{WS}_2$ NTs | $\text{GdBr}_3$ | Wt Ratio | Reaction Time | Reaction Temperature |
|--------|-------------------|-----------------|----------|---------------|----------------------|
| 1      | 20 mg             | 50 mg           | 1:2.5    | 168 h         | 1000°C               |

|   |       |        |      |       |        |
|---|-------|--------|------|-------|--------|
| 2 | 20 mg | 100 mg | 1:5  | 168 h | 1000°C |
| 3 | 20 mg | 200 mg | 1:10 | 168 h | 1000°C |
| 4 | 20 mg | 300 mg | 1:15 | 168 h | 1000°C |

**Table S3** Experimental Conditions of the filling of the WS<sub>2</sub> Nanotubes with GdCl<sub>3</sub> (Melting Point 609 °C). Temperature at which the filling reaction was carried out: 1000 °C (3° C/min heating and cooling rate).

| Sample | WS <sub>2</sub> NTs | GdCl <sub>3</sub> | Wt Ratio | Reaction Time | T      |
|--------|---------------------|-------------------|----------|---------------|--------|
| 1      | 20 mg               | 50 mg             | 1:2.5    | 168 h         | 1000°C |
| 2      | 20 mg               | 100 mg            | 1:5      | 168 h         | 1000°C |
| 3      | 20 mg               | 200 mg            | 1:10     | 168 h         | 1000°C |
| 4      | 20 mg               | 300 mg            | 1:15     | 168 h         | 1000°C |

**Table S4** EDS elemental quantification of Gd and I in GdI<sub>3</sub>@WS<sub>2</sub> NT (Ref: Figure 1c) using Gd-L and I-L peaks.

| Element | Atomic% |
|---------|---------|
| Gd(M)   | 25.8    |
| I(L)    | 74.2    |

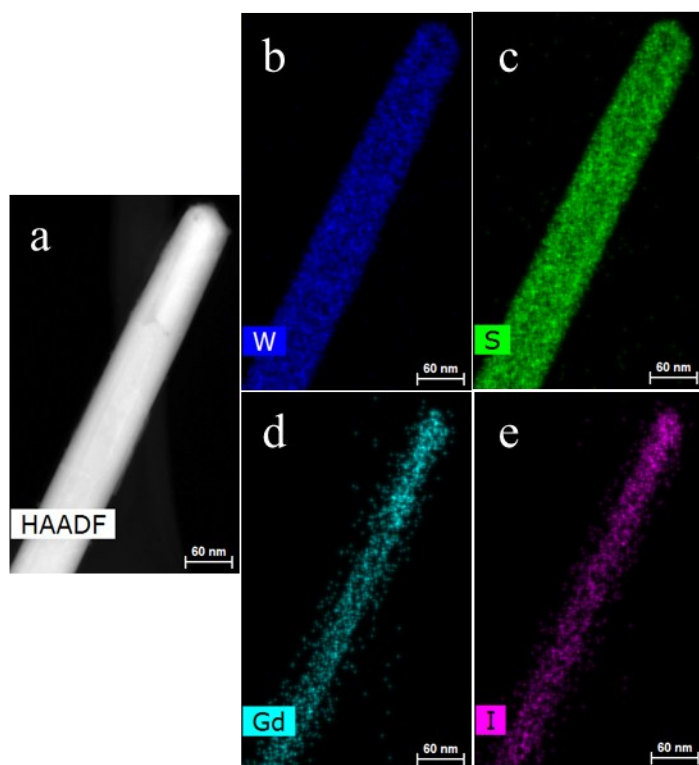

**Fig. S1** a) HAADF-STEM image of the GdI<sub>3</sub> filled WS<sub>2</sub> nanotubes and b-e) corresponding EDS elemental maps showing W, S, Gd and I.

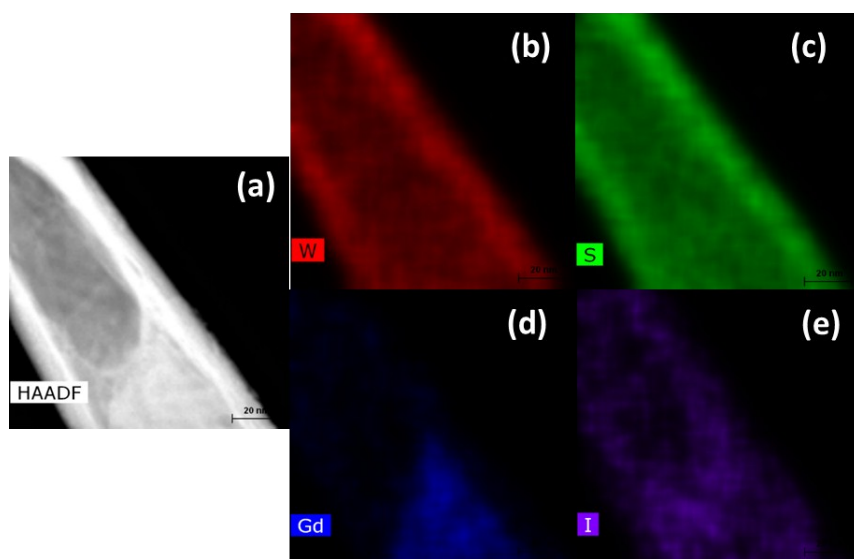

**Fig. S2** HAADF-STEM image of the GdI<sub>3</sub> filled WS<sub>2</sub> structure (a) and corresponding EDS elemental maps showing W (b), S (c), Gd (d) and I (e).

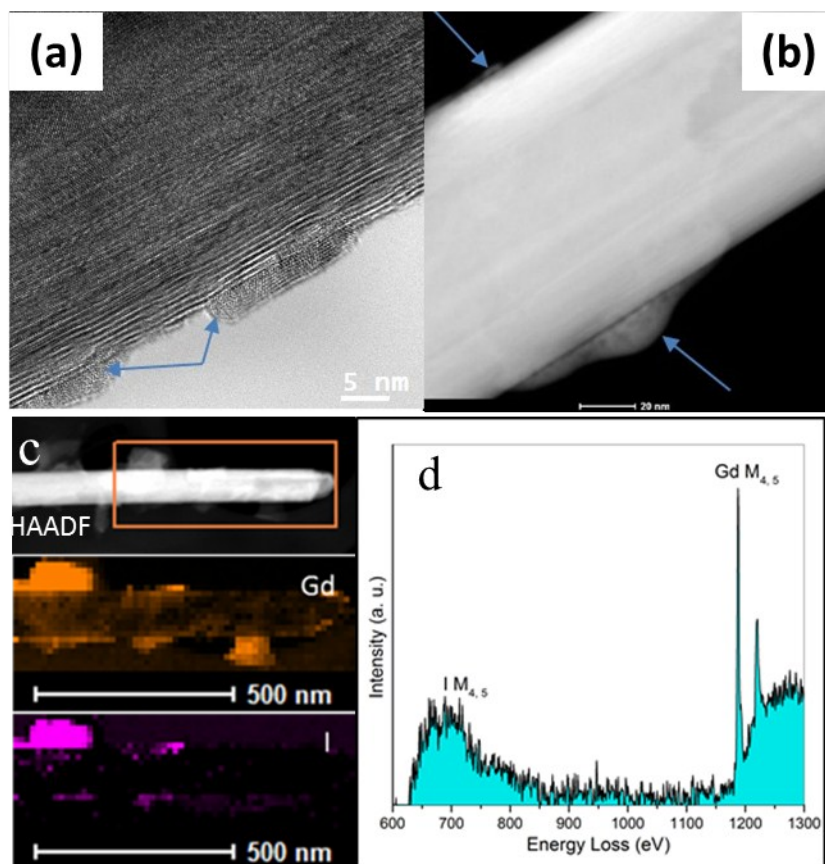

**Fig. S3** a) and b) are HRTEM and HAADF-STEM images of  $\text{GdI}_3@WS_2$  nanotubes showing the presence of  $\text{GdI}_3$  inside the nanotube and on the surface obtained on using 1:10 ratio of  $WS_2$ :  $\text{GdI}_3$ . c) low magnification HAADF-STEM image of  $\text{GdI}_3@WS_2$  and the corresponding EELS spectrum images showing Gd and I. d) EELS spectrum.

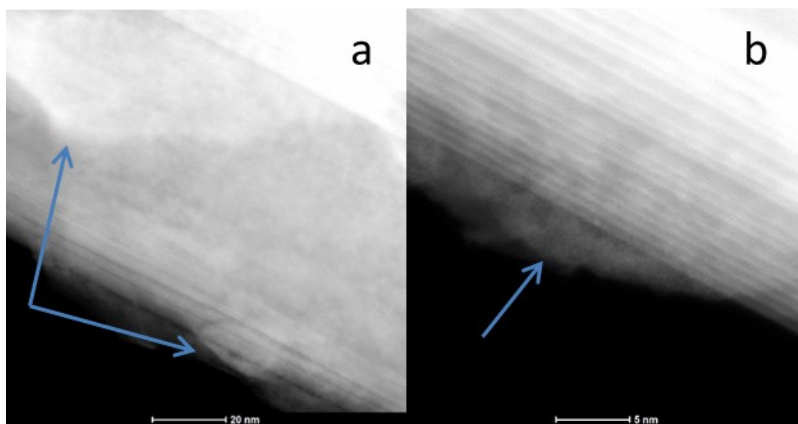

**Fig. S4** HAADF-STEM images of  $\text{GdBr}_3$  filled and coated  $WS_2$  Nanotubes. Arrows show the  $\text{GdBr}_3$  on the surface of  $WS_2$  nanotube.

### HRTEM Image Simulation

For the HRTEM image simulations, the models of the empty  $\text{WS}_2$  nanotube,  $\text{GdI}_3$  nanorod and  $\text{GdI}_3@ \text{WS}_2$  composite were created with Crystal Maker v9.2.5. Due to the limit imposed by the modeling software on the maximum number of atoms, only small sections of the nanotubes were considered. In addition, the number of walls of the multiwall  $\text{WS}_2$  had to be reduced. The HRTEM micrographs were simulated using a multislice algorithm, QSTEM, developed by Christoph Koch. While the use of this algorithm is not strictly correct - given the dimensions and high atomic weight of the elements considered, the simulated images allowed us to appreciate better the orientation of the metal halide crystals inside the nanotubes. The microscope parameters were: 200 kV, 1  $\mu\text{m}$  of spherical aberration, 0.8 eV of energy resolution, defocus of 100, 50, 0, -50 and -100 nm.

Three models were built and their corresponding HRTEM images simulated: 1) an empty 3-layered  $\text{WS}_2$  nanotube, 2) a rhombohedral  $\text{GdI}_3$  crystallite, 3) the filled nanotube composite joining models 1) and 2).

#### 1. Empty $\text{WS}_2$ nanotube

A three layered  $\text{WS}_2$  nanotube with an external diameter of 20 nm diameter and length of 10 nm was modeled, bearing an interlayer spacing identical to that measured from the micrographs.

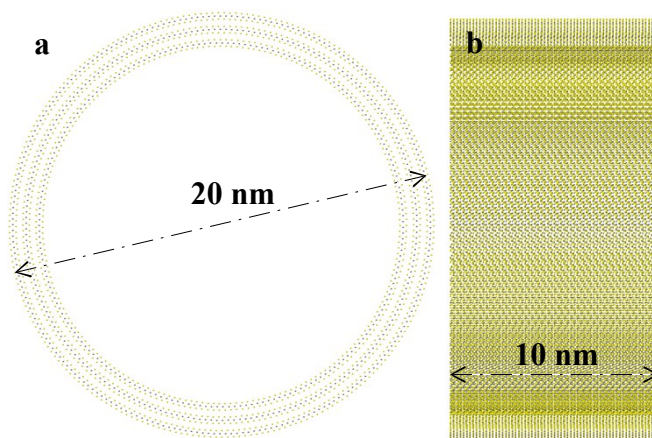



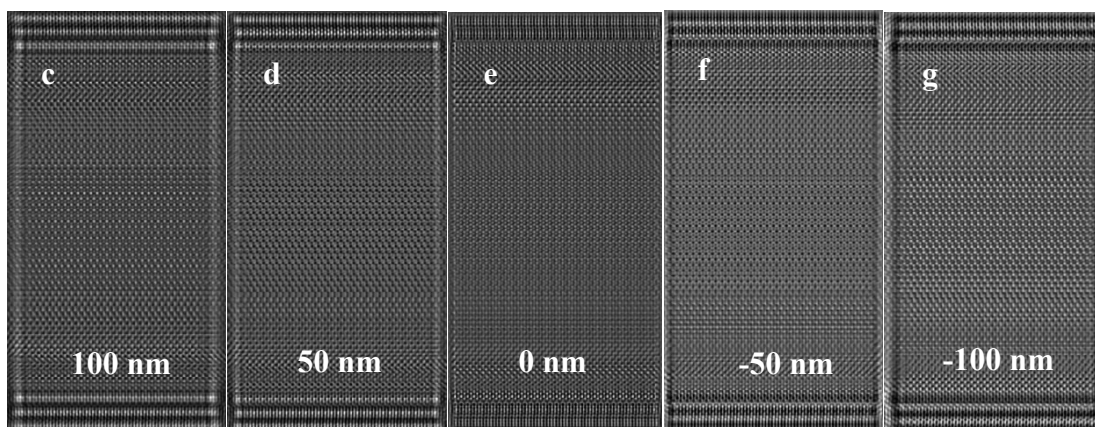

**Fig. S5** a) and b) end-on and side-on views of the empty  $\text{WS}_2$  nanotube model; c) – g) HRTEM simulated images of b) at different defocus values.

## 2. $\text{GdI}_3$ crystallite

The  $\text{GdI}_3$  crystal, without the nanotube, was modelled with an orientation close to the real crystal as obtained from the FFTs. Zone axis of crystal is  $\langle 300 \rangle$  with  $00\bar{3}$  planes that are oriented perpendicular to the viewer. The crystal is 16 nm in diameter in order to fit inside the 17.6 nm inner diameter  $\text{WS}_2$  nanotube.

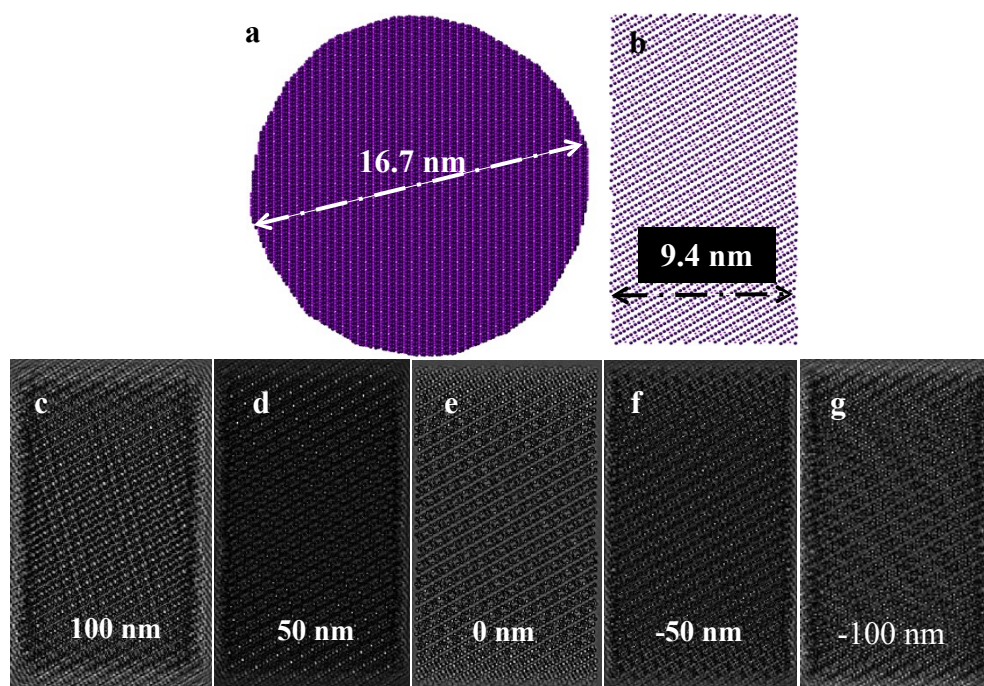

**Fig. S6** a) and b) end-on and side-on views of the  $\text{GdI}_3$  model; c) – g) HRTEM simulated images of b) at different defocus values.

## 3. $\text{GdI}_3@ \text{WS}_2$ composite



The models of the multilayered  $\text{WS}_2$  nanotube and the  $\text{GdI}_3$  crystal were combined to construct the composite observed experimentally. The simulated HRTEM images confirm that it is easy to identify the filled section of the nanotube and the convex meniscus of the metal halide nanowire.

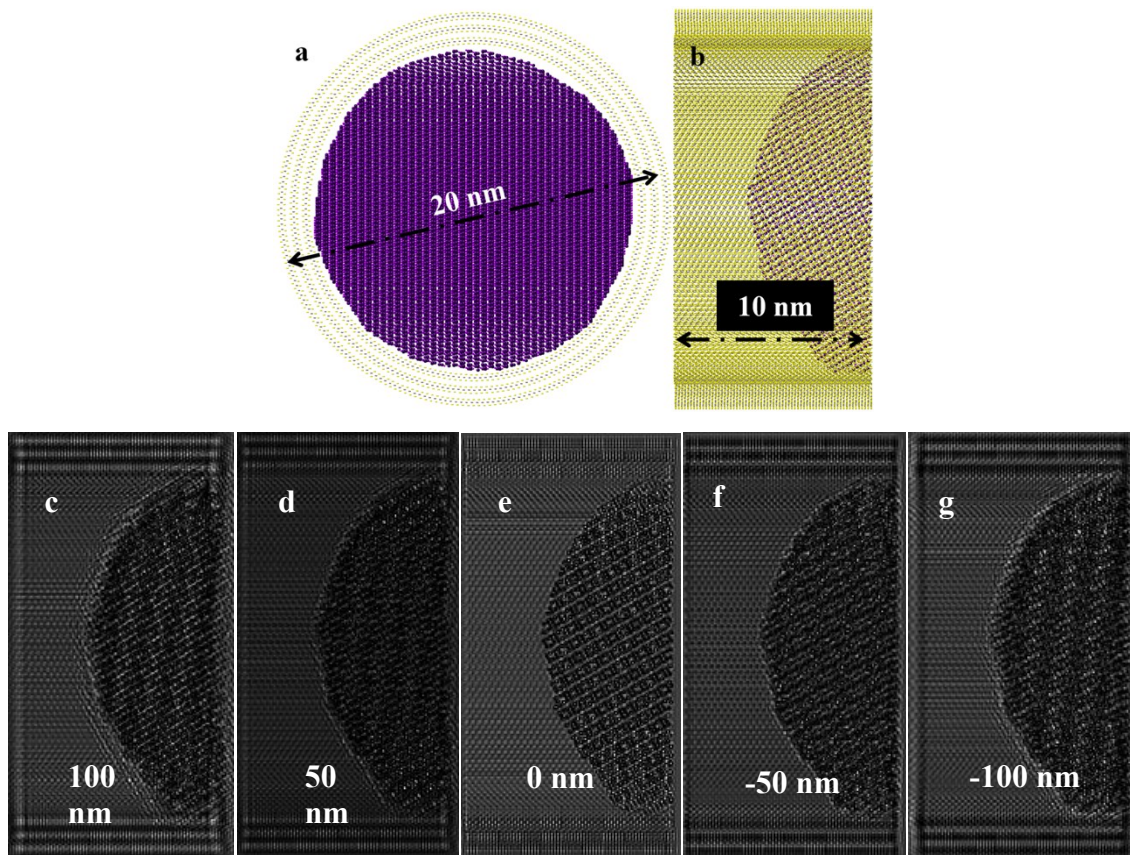

**Fig. S7** a) and b) end-on and side-on views of filled nanotube model; c) – g) HRTEM simulated images of b) at different defocus values.

Further to the HRTEM micrographs, electron diffraction patterns were also simulated. For this, the software SIMULATEM was used. Instead of employing the entire model of the tube, flattened cut-sections of the empty and filled nanotube were employed to reproduce the square regions in Figure 4a where the FFTs were taken from. Both the ring-like reflections of the metal disulfide nanotubes and the lower frequency spots assigned to the  $\text{GdI}_3$  crystal were obtained.

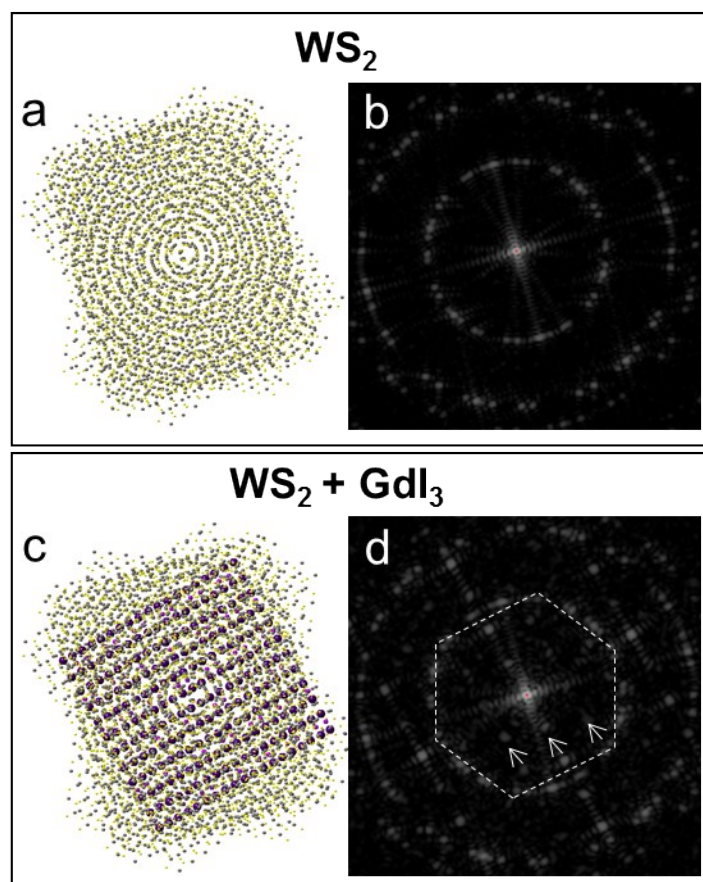

**Fig. S8** a) Model for hexagonal  $WS_2$  planes with interlayer stack rotation; b) Simulated ED pattern for a); c) Model for a heterostructure combining various  $WS_2$  rotated monolayers and a  $GdI_3$  crystallite on top; d) Simulated ED pattern for c).

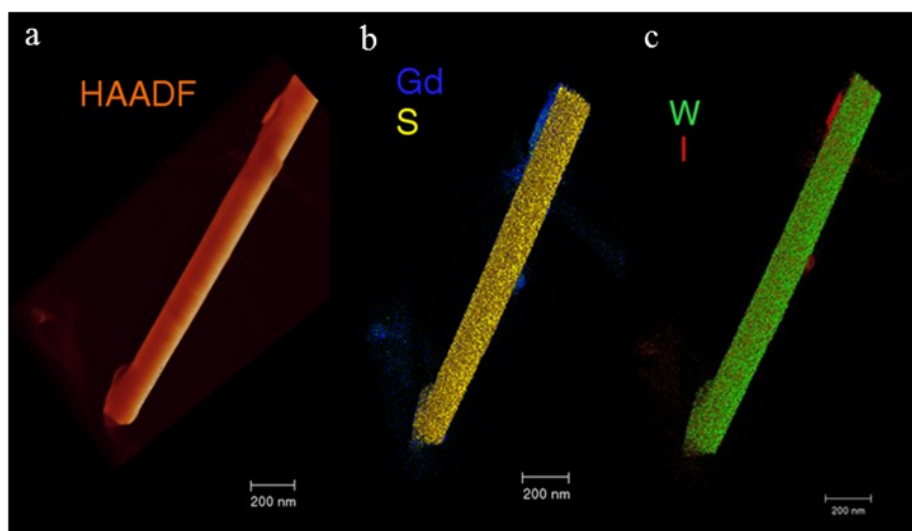

**Fig. S9** Tomograms of  $GdI_3$  coated  $WS_2$  nanotube a) HAADF-STEM Image b) Gd (Blue) and S (Yellow) and c) W (green) and I (red).

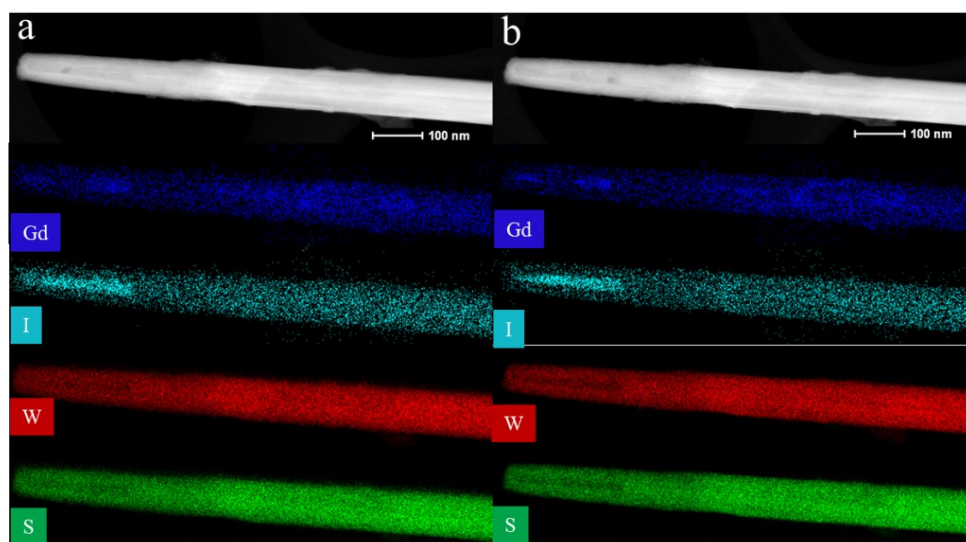

**Fig. S10** HAADF-STEM (greyscale) and EDS elemental maps (Gd (blue), I (cyan), W (red), S (green)) of GdI<sub>3</sub> filled WS<sub>2</sub> a) at time 0 and b) after 30 minutes (after). The experiment was done at 80 kV using 0.64 nA probe current and a dose of 0.55 e/ $\text{\AA}^2\text{s}$ .

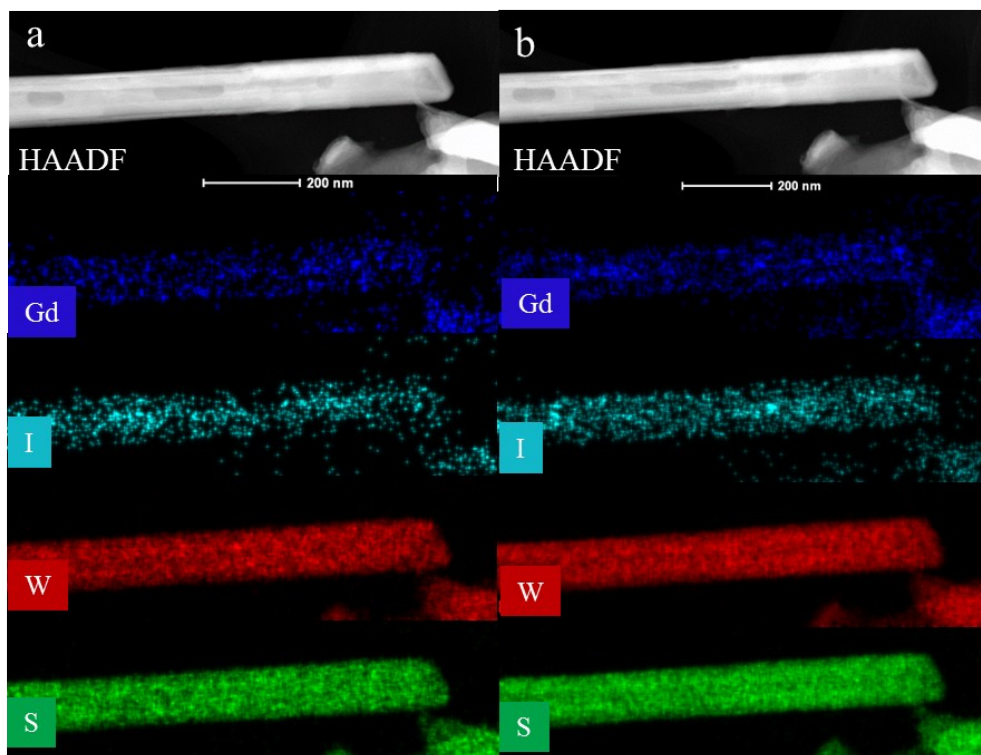

**Fig. S11** HAADF images and EDS elemental maps (Gd (blue), I (cyan), W (red), S (green)) of GdI<sub>3</sub> filled WS<sub>2</sub> a) at time 0 and b) after 30 minutes of exposure. The experiment was done at 200 kV using 0.46 nA probe current and a dose of 0.40 e/ $\text{\AA}^2\text{s}$ .

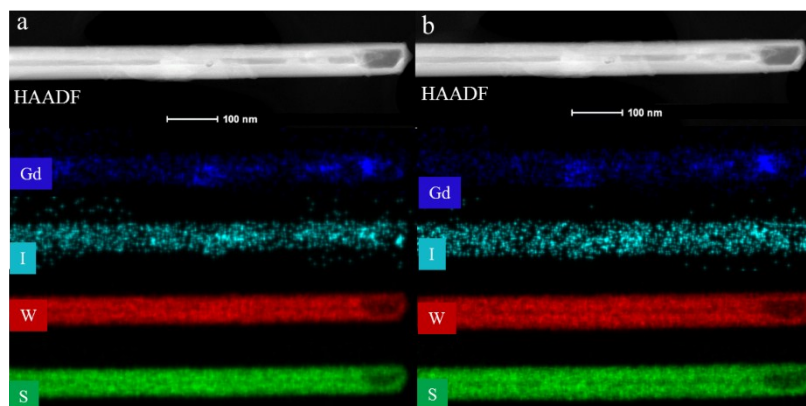

**Fig. S12** HAADF-STEM and EDS elemental maps (Gd (blue), I (cyan), W (red), S (green)) of GdI<sub>3</sub> filled WS<sub>2</sub> a) at time 0 and b) after 30 minutes of exposure. The experiment was done at 200 kV using 0.46 nA probe current and a dose of 0.40 e/ $\text{\AA}^2\text{s}$ .



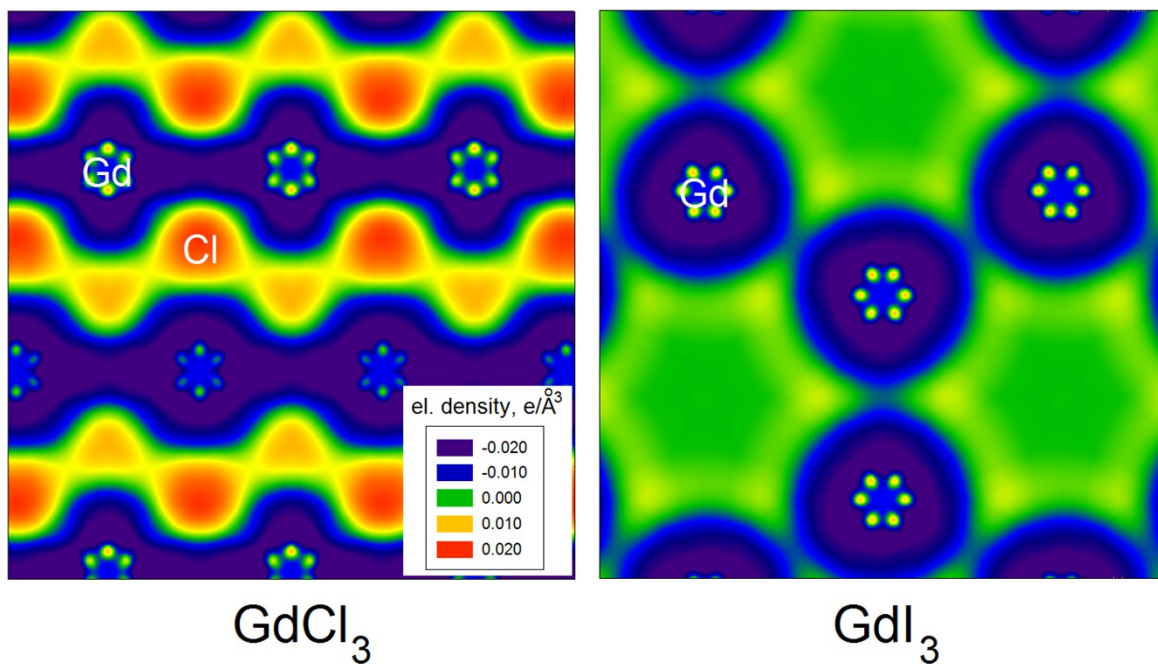

**Fig. S13** Electron density redistribution in the layered crystals of  $\text{GdCl}_3$  and  $\text{GdI}_3$  within the intralayer Gd plane. Gd atoms in both trihalides experience an essential lack of valence electron density (only, half-occupied Gd4f-orbitals are visible). The main part of electron density is located in the vicinity of halogen atoms (out of these planes). High ionicity and absence of covalent Gd-Gd bonding is also affirmed by the values of crystal orbital overlap populations (COOP Gd-Gd  $< 0.001$ - $0.01$  e, COOP Gd-Cl  $0.21$  e, COOP Gd-I  $0.25$  e). The calculations have been performed using DFT pseudopotential approach as implemented in SIESTA software<sup>20</sup> at GGA level and applying single- $\zeta$  basis sets with polarization functions.

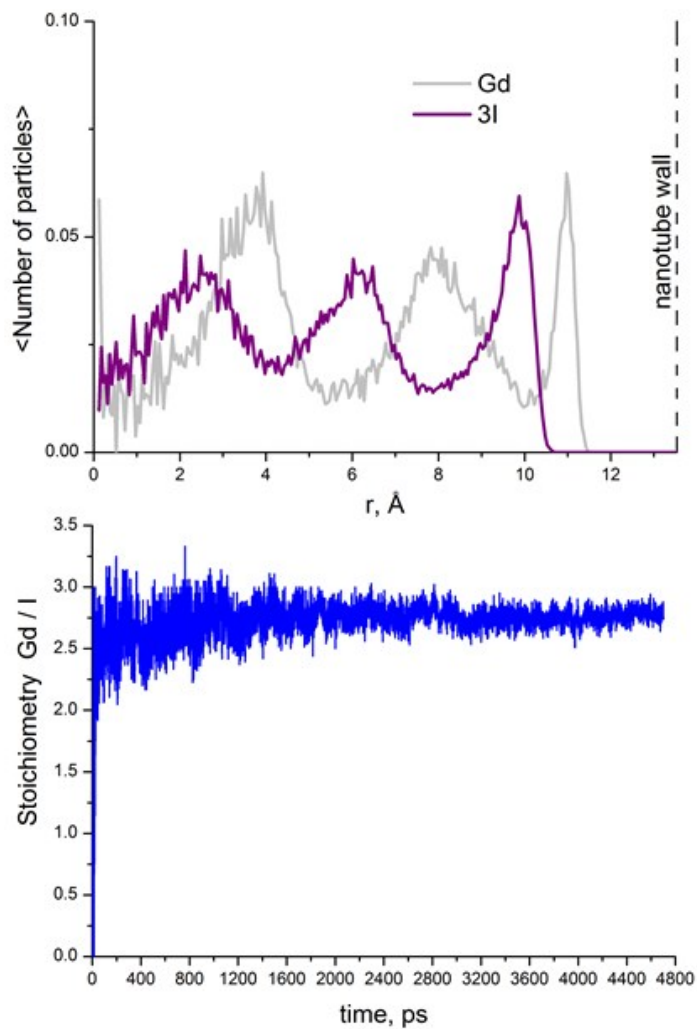

**Fig. S14** Radial distribution functions of Gd and I ions within the melt part of  $\text{GdI}_3$  penetrated into the cavity of double-walled (30,0)@(42,0) 2H- $\text{WS}_2$  nanotube after MD simulations during 4.8 ns at  $T = 1300\text{K}$  (*on the top*). Corresponding time modulation in stoichiometry of  $\text{GdI}_3$  melt is given below.

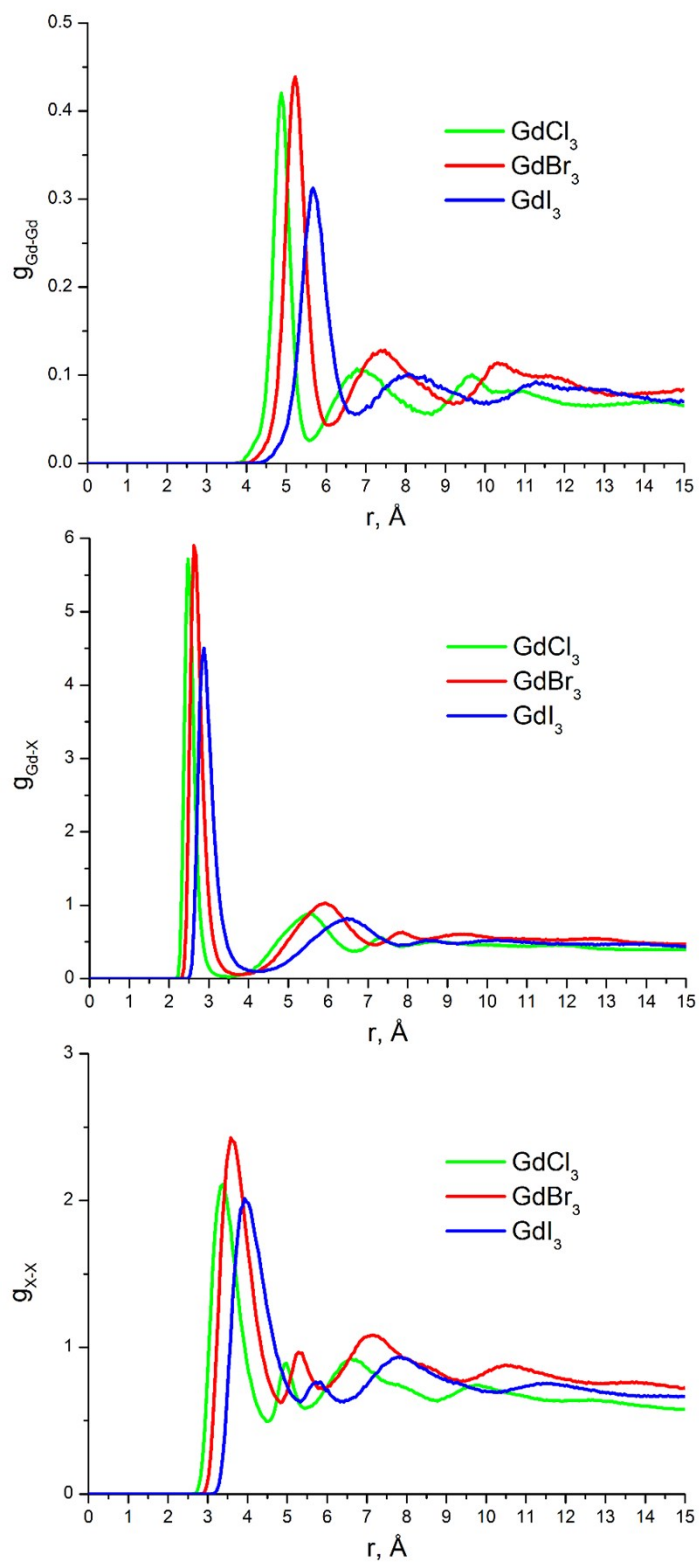

**Fig. S15** Pair distribution functions within GdX<sub>3</sub> drops (X = Cl, Br, I) after MD annealing of (GdX<sub>3</sub>)<sub>1000</sub> nanodrops during 2 ns at T = 1300K.



**S16 Video1** Tomography of  $\text{GdI}_3$  on  $\text{WS}_2$  Nanotube

**S17 Video2** EDS Tomography 1 -  $\text{GdI}_3$ @ $\text{WS}_2$  Nanotube

**S18 Video3** EDS Tomography 2-  $\text{GdI}_3$ @ $\text{WS}_2$  Nanotube-Higher Electron Dose

**S19 Video4** MD- $\text{GdCl}_3$ - $\text{WS}_2$  or [https://youtu.be/WpOlybxT\\_4s](https://youtu.be/WpOlybxT_4s)

**S20 Video5** MD- $\text{GdBr}_3$ - $\text{WS}_2$  or [https://youtu.be/d-8u\\_snql1c](https://youtu.be/d-8u_snql1c)

**S21 Video6** MD- $\text{GdI}_3$ - $\text{WS}_2$  or <https://youtu.be/qVDE1vEXxo8>

**S22 Video7** MD- $\text{GdCl}_3$ - $\text{WS}_2$  2 or <https://youtu.be/MGoYMfXv4ZE>
